# Supplementary material
Source: PubMed Central journal article supplement (PMC8173763)

# Richards et al. Supplemental Figure 1: sgRNA Off-Target Sanger Sequencing

## A. Guide 4 Off-Target Sanger Sequencing

**Guide 4 Sequence:** GTGTTGCCCTGACGTAGCAG**TGG**

**Location:** Chr8:115751069

**Sequence:** GTGGTGCCTGAGGTAGCAG**TGG**

**COSMID Score:** 2.01

G T G G T G C C T G A G G T A G C A G T G G

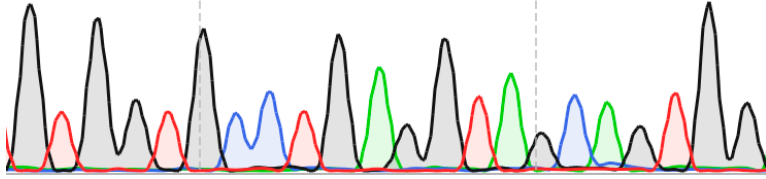

**Location:** Chr2:33139660

**Sequence:** TTGTTGCCCTGACATGGCAG**TGG**

**COSMID Score:** 3.72

T T G T T G C C C T G A C A T G G C A G T G G

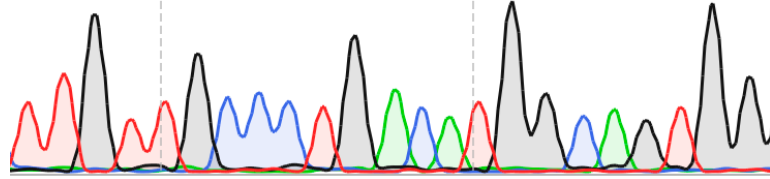

**Location:** ChrX:57746102

**Sequence:** GTGTAGCCTGATGTAGCAG**AGG**

**COSMID Score:** 2.03

Chromatogram displaying complementary sequence:

C C T C T G C T A C A T C A G G C T A C A C

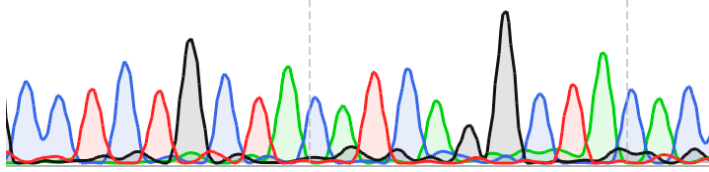

**Location:** Chr8:86472947

**Sequence:** GTGTTGTCCCTGAGCTAGCAG**TGG**

**COSMID Score:** 3.72

Chromatogram displaying complementary sequence:

C C A C T G C T A G C T C A G G G A C A A C A C

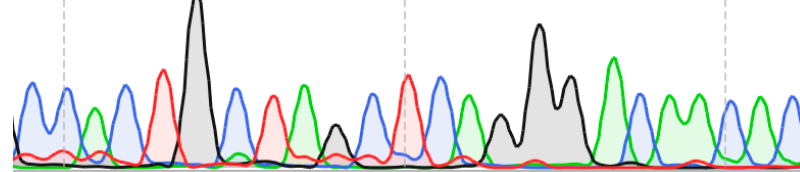

## B. Guide 8 Off-Target Sanger Sequencing

**Guide 8 Sequence:** TTTGGGCAGGTAAGCCTGTT**GGG**

**Location:** Chr13:35827032

**Sequence:** TATGCCAGGTAAGCCTGTT**CGG**

**COSMID Score:** 1.02

Chromatogram displaying complementary sequence:

C C G A A C A G G C T T A C C T G G C A T A

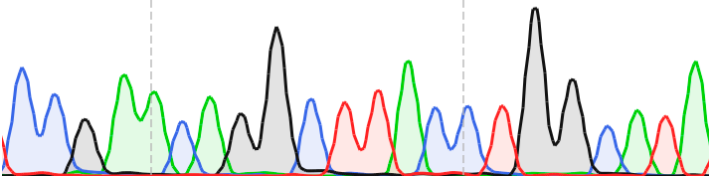

**Location:** Chr12:95441363

**Sequence:** TTAGGGAAGGAAGCCTGTT**GGG**

**COSMID Score:** 1.59

T T A G G G A A G G A A G C C T G T T G G G

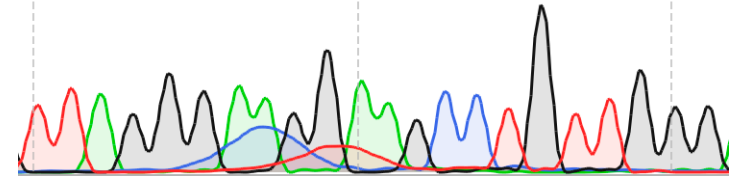

**Location:** Chr1:22629912

**Sequence:** TGTGGGTAGGAAGCCTGTT**CGG**

**COSMID Score:** 1.57

Chromatogram displaying complementary sequence:

C C G A A C A G G C T T C C T A C C C A C A

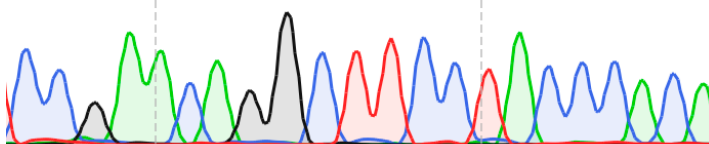

**Location:** Chr5:110339511

**Sequence:** TCTGGTCAGGTAAGCCTGTT**GGG**

**COSMID Score:** 1.84

Chromatogram displaying complementary sequence:

C C C A A C A G G C T T T A C C T G A C C A G A

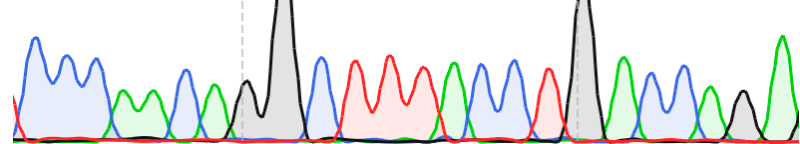

Supplement: NIHMS1698738-supplement-Supplementary_figure.pdf [file NIHMS1698738-supplement-Supplementary_figure.pdf]
